# Supplementary material
Source: Research Square preprint supplement (doi:10.21203/rs.3.rs-8924395/v1)
Supplement: Supplementary file 1 [file c43b652c3966c90bdd62d85f.docx]

Supplementary material

**Title:** **Co-culture of the aerial microalga *Coelastrella rubescens* KGU-HN001 and the nitrogen fixing-bacterium *Rhodobacter sphaeroides* under aerial-phase conditions**

**Nobuhiro Aburai*, Tomoka Koike, Takayuki Tsukagoshi**

Department of Chemistry and Life Science, School of Advanced Engineering, Kogakuin University, 2665-1 Nakano-machi, Hachioji, Tokyo 192-0015, Japan

*Corresponding author

E-mail address: bt13347@ns.kogakuin.ac.jp (N. Aburai)
Tel.: +81 42 628 4847

FAX: +81 42 628 5647


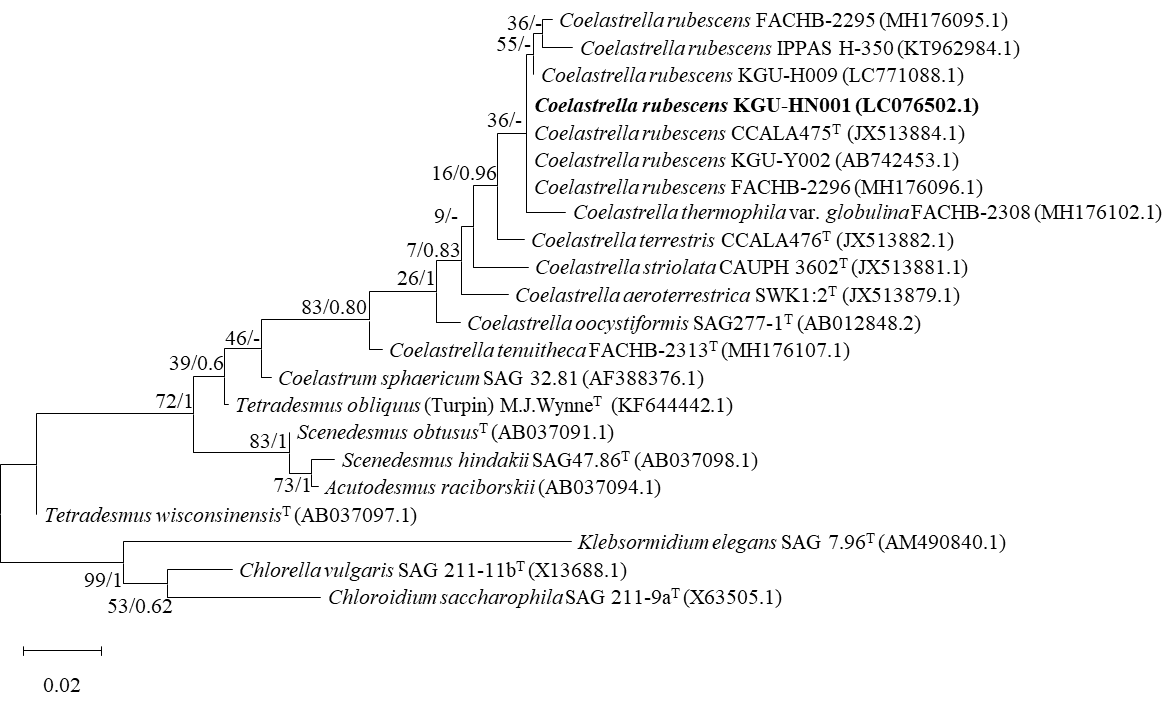


**Fig. S1.** Phylogenetic tree of isolated bacterium with its known neighbors based on 18S rRNA gene sequences. Tree was constructed using the neighbor-joining method; scale bar represents evolutionary distance (Knuc) of 0.02; and numbers at branch nodes are bootstrap values (1000 replicates) obtained using the maximum-likelihood method. Accession numbers for DNA sequences are indicated in parentheses. T is type strain.


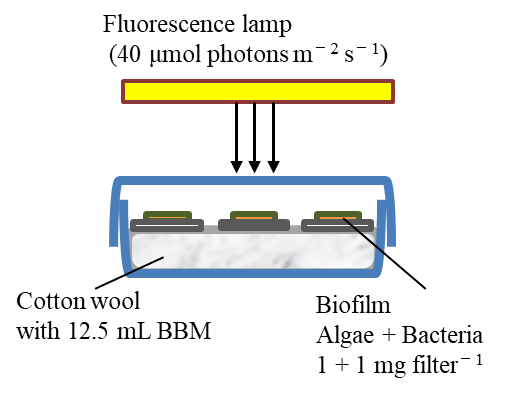


**Fig. S2.** Diagram of culture method for biofilms under aerial conditions.


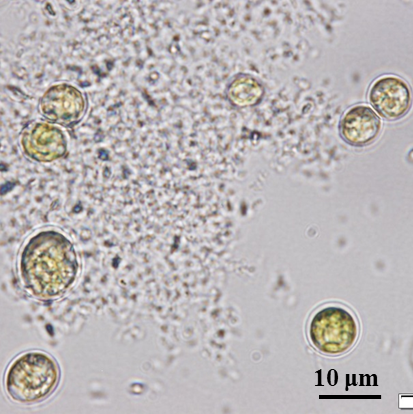


**Fig. S3.** Image of cells in the mixed biofilm under aerial culture conditions.

(**A**)


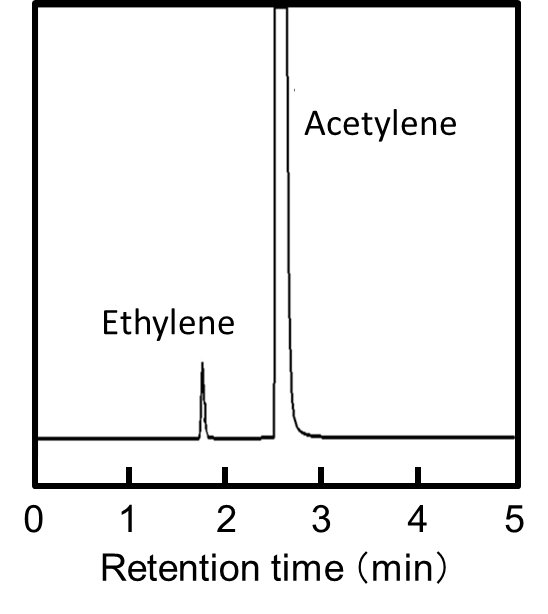


(**B**)


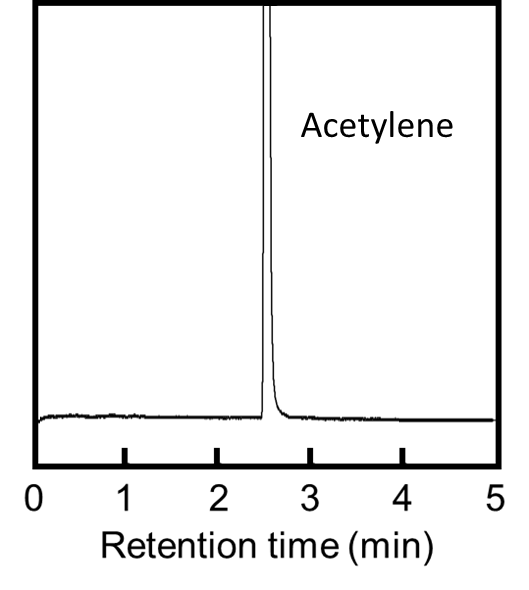


**Fig. S4.** Chromatogram of substrate and product (ethylene) obtained using the acetylene reduction assay. co-culture of algal and bacterial cells (mixed biofilm) (A) and negative control (only acetylene) (B).

(A)


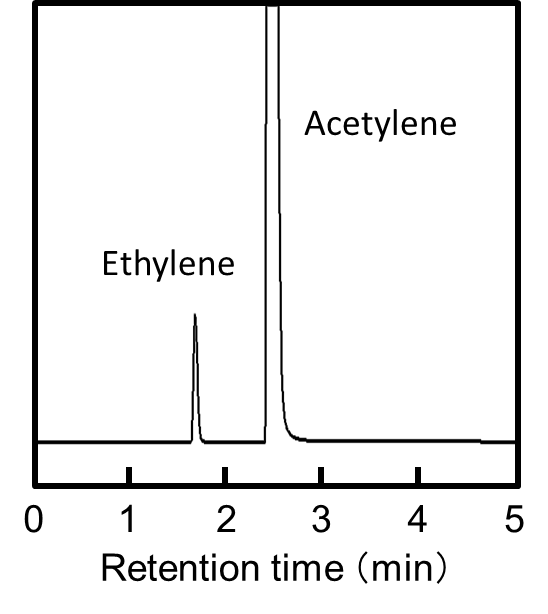


(B)


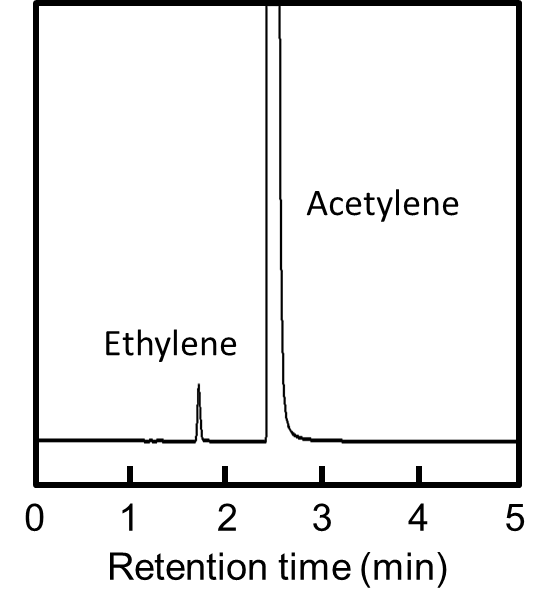


**Fig. S5.** Acetylene reduction assay. Co-culture of algal and bacterial cells and the biofilms where the two organisms were arranged far apart (A) or as a bilayer (upper layer: microalga, lower layer: bacterium) (B).
